# Supplementary material
Source: MDPI journal article supplement (https://www.mdpi.com/2071-1050/11/12/3426)
Supplement: s1 [file s1]

Explanation of equations and Parameters of Bioenergy-effect-policy System Dynamics model that make the biomass power generation project economically feasible.

1. distance from temporary storage station to biomass power plant=18 (unit: km)
2. SO<sub>2</sub> emission factor of diesel heavy-duty vehicles=3e-007 (unit: ton/km)
3. SO<sub>2</sub> emission factor of diesel light-duty vehicles= 1e-007 (unit: ton/km)
4. SO<sub>2</sub> emission factor of traditional power= 0.0151579 (unit: ton/MWh)
5. CO emission factor of biomass power generation= 0.0080332 (ton/MWh)
6. NO<sub>x</sub> emission factor of biomass power generation= 0.0008626 (ton/MWh)
7. SO<sub>2</sub> emission factor of biomass power generation= 0.0000228 (ton/ MWh)
8. NO<sub>x</sub> emission factor of traditional power=0.0038332 (unit: ton/MWh)
9. emission reduction of CO= equivalent traditional power\*(CO emission factor of traditional power-CO emission factor of biomass power generation) (unit: ton)
10. CO emission factor of traditional power= 0.0001937 (unit: ton/MWh)
11. difference between fiscal subsidy and positive externalities=positive externalities-fiscal subsidy (unit: thousand US dollars)
12. accumulated difference between fiscal subsidy and positive externalities= INTEG(difference between fiscal subsidy and positive externalities,0) (unit: thousand US dollars)
13. CO<sub>2</sub> emission factor of diesel light-duty vehicles=0.000356 (unit: ton/km)
14. distance from household to temporary storage station=13 (unit: km)
15. CO<sub>2</sub> emission factor of diesel heavy-duty vehicles=0.000932 (unit: ton/km)
16. CO<sub>2</sub> emission of transportation= total volume of biomass transportation/average load of light-duty vehicles per trip\*distance from household to temporary storage station\*tortuous factor of rural road\*CO<sub>2</sub> emission factor of diesel light-duty vehicles + total volume of biomass transportation/average load of heavy-duty vehicles per trip\*distance from temporary storage station to biomass power plant\*CO<sub>2</sub> emission factor of diesel heavy-duty vehicles (unit: ton)
17. CO<sub>2</sub> emission factor of traditional power= 1.09417 (unit: ton/MWh)
18. emission reduction of CO<sub>2</sub>=equivalent traditional power\*CO<sub>2</sub> emission factor of traditional power-CO<sub>2</sub> emission of transportation-equivalent traditional power\*life cycle GHG emission intensity of biomass power (unit: ton)
19. average load of heavy duty vehicles per trip=12 (unit: ton)
20. tortuous factor of rural road=1.414
21. average load of light-duty vehicles per trip=3.5 (ton)
22. life cycle GHG emission intensity of biomass power=0.045 (unit: ton/MWh)
23. benefit of CDM=emission reduction of CO<sub>2</sub>\*price of CO<sub>2</sub> (unit: thousand US dollars)
24. SO<sub>2</sub> emission of transportation= total volume of biomass transportation/average load of light-duty vehicles per trip\*distance from household to temporary storage station\*tortuous factor of rural road\*SO<sub>2</sub> emission factor of diesel light-duty vehicles+total volume of biomass transportation/average load of heavy-duty vehicles per trip\*distance from temporary storage station to biomass power plant\*SO<sub>2</sub> emission factor of diesel heavy-duty vehicles (unit: ton)
25. total volume of biomass transportation=consumption of apple branches+consumption of other biomass
26. price of CO= 0.34572 (unit: thousand US dollars/ton)
27. price of SO<sub>2</sub>= 2.2126 (unit: thousand US dollars/ton)

28. price of NO<sub>x</sub>= 2.76574 (unit: thousand US dollars/ton)
29. price of CO<sub>2</sub>= 0.01521 (unit: thousand US dollars/ton)
30. social benefits = benefits of employment increase + increased income from biomass sales (unit: thousand US dollars)
31. positive externalities = positive environmental externalities + social benefits (unit: thousand US dollars)
32. positive environmental externalities = benefit of CDM + environmental value of CO emission reduction+ environmental value of NO<sub>x</sub> emission reduction + environmental value of SO<sub>2</sub> emission reduction (unit: thousand US dollars)
33. retrieve of circulating fund = IF THEN ELSE(Time=2039, 4231, 0) (unit: thousand US dollars)
34. environmental value of CO emission reduction=emission reduction of CO\*price of CO (unit: thousand US dollars)
35. environmental value of NO<sub>x</sub> emission reduction =emission reduction of NO<sub>x</sub>\*price of NO<sub>x</sub> (unit: thousand US dollars)
36. environmental value of SO<sub>2</sub> emission reduction=emission reduction of SO<sub>2</sub>\*price of SO<sub>2</sub> (unit: thousand US dollars)
37. emission reduction of SO<sub>2</sub> = equivalent traditional power\*(SO<sub>2</sub> emission factor of traditional power-SO<sub>2</sub> emission factor of biomass power generation) (unit: ton)
38. emission reduction of NO<sub>x</sub> = equivalent traditional power\*(NO<sub>x</sub> emission factor of traditional power-NO<sub>x</sub> emission factor of biomass power generation) (unit: ton)
39. equivalent traditional power = biomass power generation (unit: MWh)
40. available sales rate of apple branches = INTEG(increment of sales rate,0.5)
41. increment of sales rate = IF THEN ELSE(available sales rate of apple branches<=0.7,0.02 , 0)
42. production rate of other biomass ash = 0.0514 (unit: ton/ton)
43. production rate of apple branches ash = 0.0247 (unit: ton/ton)
44. production of ash = consumption of apple branches\*production rate of apple branches ash + consumption of other biomass\*production rate of other biomass ash (unit: ton)
45. consumption of apple branches = IF THEN ELSE(available sales rate of apple branches\*total output of apple branches>=demand of apple branches ,demand of apple branches, available sales rate of apple branches\*total output of apple branches) (unit: ton)
46. benefit of biomass ash = price of ash\*production of ash (unit: thousand US dollars)
47. price of ash = 39.29 (unit: US dollars/ton)
48. demand of apple branches = biomass power generation\*3.6\*10000/lower heat value of apple branches/generating efficiency/1000 (unit: ton)
49. total output of apple branches = yield of apple branches per unit area\*apple cultivated area\*10000 (unit: ton)
50. yield of apple branches per unit area = ((({(2018,300)-(2040,700)}),(2018,375),(2020,450),(2025,480),(2030,525),(2035,600),(2040,660) )) (unit: ton/km<sup>2</sup>)
51. apple cultivated area = 707 (unit: km<sup>2</sup>)
52. agricultural population = IF THEN ELSE(Time=2018,387802 , -2.41667e+007\*EXP(-0.0184247\*(Time-2010))-(-2.41667e+007\*EXP(-0.0184247\*(DELAY1(Time, 1)-2010)))) (unit: person)
53. total population = IF THEN ELSE(Time=2018,487821,-3.65806e+009\*EXP(-0.000133\*(Time-2010))+3.65854e+009-(-3.65806e+009\*EXP(-0.000133\*(DELAY1(Time,1)-2010))+3.65854e+009)) (unit: person)

54. urbanization rate = (total population-agricultural population)/total population
55. increment of rural per capita net income = fuel cost\*1000/agricultural population (unit: US dollars/person)
56. fuel cost = price of apple branches\*consumption of apple branches/1000+consumption of other biomass\*price of other biomass/1000 (unit: thousand US dollars)
57. consumption of other biomass = IF THEN ELSE(consumption of apple branches<demand of apple branches, (demand of apple branches-consumption of apple branches ) \*lower heat value of apple branches/lower heat value of other biomass, 0) (unit: ton)
58. demand of apple branches = biomass power generation\*3.6\*1000/lower heat value of apple branches/generating efficiency/1000 (unit: ton)
59. lower heat value of apple branches = 16.34 (unit: MJ/kg)
60. generating efficiency = 0.175
61. biomass power generation = IF THEN ELSE(Time=2018, 0 , 210000 ) (unit: MWh)
62. price of apple branches =45 (unit: US dollars/ton)
63. lower heat value of other biomass = 15.33 (unit: MJ/kg)
64. price of other biomass = 45 (unit: US dollars/ton)
65. increased income from biomass sales = fuel cost-electricity expense/1000 (unit: thousand US dollars)
66. rural energy consumption from biomass = (consumption of apple branches\*1000\*lower heat value of apple branches+consumption of other biomass\*1000\*lower heat value of other biomass)\*combustion efficiency/3.6 (unit: kWh)
67. combustion efficiency = 0.1
68. electricity expense = rural energy consumption from biomass\*rural electricity price (unit: US dollars)
69. rural electricity price = 0.0771 (unit: US dollars/KWh)
70. value-added tax payable = INTEG(output tax-input tax,0) (unit: thousand US dollars)
71. urban construction tax = (output tax-input tax)\*tax rate of urban construction (unit: thousand US dollars)
72. tax rate of urban construction = 0.05
73. business tax and surcharges = education surcharges+urban construction tax (unit: thousand US dollars)
74. input tax = (fuel cost+material expenses+purchased water)\*VAT Rate (unit: thousand US dollars)
75. output tax = business income\*VAT Rate (unit: thousand US dollars)
76. VAT Rate = 0.17
77. value-added tax exempted = output tax-input tax (unit: thousand US dollars)
78. education surcharges = (output tax-input tax)\*tax rate of education surcharges (unit: thousand US dollars)
79. business income = earnings from electricity sales+heating income+ benefit of biomass ash (unit: thousand US dollars)
80. tax rate of education surcharges = 0.03
81. purchased water = consumption of water\*price of water (unit: thousand US dollars)
82. price of water = 0.5289 (unit: US dollars/ton)
83. consumption of water = IF THEN ELSE(Time=2018, 0, 1279.2 ) (unit: thousand ton)

84. price of heating = 3.92904 (unit: US dollars/GJ)
85. heating income = Heat output\*price of heating (unit: thousand US dollars)
86. Heat output = IF THEN ELSE(biomass power generation=0, 0, 483 ) (unit: thousand GJ)
87. earnings from electricity sales = price of biomass power\*biomass power generation\*ratio of electricity sales (unit: thousand US dollars)
88. price of biomass power = price of traditional power + subsidy intensity of biomass power price (unit: US dollars/kWh)
89. price of traditional power= 0.0453 (unit: US dollars/kWh)
90. subsidy intensity of biomass power price= 0.0619 (unit: US dollars/kWh)
91. ratio of electricity sales = 0.9
92. total investment = INTEG(current year investment,0) (unit: thousand US dollars)
93. current year investment = circulating fund investment + Fixed assets investment (unit: thousand US dollars)
94. Fixed assets investment = IF THEN ELSE(Time=2018,self-owned construction fund + long-term loan, 0 ) (unit: thousand US dollars)
95. long-term loan = 31844 (unit: thousand US dollars)
96. self-owned construction fund = IF THEN ELSE(Time=2018,13649, 0 ) (unit: thousand US dollars)
97. self-owned circulating fund = IF THEN ELSE(Time=2018, 1269, 0) (unit: thousand US dollars)
98. circulating fund investment = IF THEN ELSE(Time=2018, "self-owned circulating fund"+"short-term loan", 0 ) (unit: thousand US dollars)
99. short-term loan = 2962 (unit: thousand US dollars)
100. total cost = Depreciation of fixed assets + financial expenses + fuel cost + maintenance cost of fixed assets + material expenses + purchased water + wages and benefits (unit: thousand US dollars)
101. Depreciation of fixed assets = IF THEN ELSE(Time=2018, 0 , 1911) (unit: thousand US dollars)
102. maintenance cost of fixed assets = IF THEN ELSE(Time=2018, 0 , 796.196 ) (unit: thousand US dollars)
103. financial expenses = "long-term loan"\*"Long-term loan interest rate"+"short-term loan"\*"Short-term loan interest rate" (unit: thousand US dollars)
104. material expenses = IF THEN ELSE(Time=2018, 0 , 36.26)
105. Long-term loan interest rate = 0.0594
106. Short-term loan interest rate = 0.0556
107. average wage = IF THEN ELSE(Time=2018, 7.56, 7.56\*(1+0.05)^(Time-2018)) (unit: thousand US dollars)
108. benefits of employment increase = IF THEN ELSE(Time=2018, 0, wages and benefits-number of employees\*(rural average income\*(1-urbanization rate)+urban average income\*urbanization rate)/1000) (unit: thousand US dollars)
109. rural average income = IF THEN ELSE(Time=2018, 1160, 1160\*(1+0.05)^(Time-2018) ) (unit: US dollars)
110. urban average income = IF THEN ELSE(Time=2018, 3840, 3840\*(1+0.05)^(Time-2018) ) (unit: US dollars)
111. number of employees = 74 (unit: person)
112. wages and benefits = IF THEN ELSE(Time=2018, 0 , average wage\*number of employees )

- (unit: thousand US dollars)
113. current year profit = business income-business tax and surcharges-total cost (unit: thousand US dollars)
114. subsidy of biomass power price = 0.0619 (unit: US dollars)
115. subsidy from exempted tax = income tax exempted+"value-added tax exempted" (unit: thousand US dollars)
116. fiscal subsidy = price subsidy + subsidy from exempted tax (unit: thousand US dollars)
117. price subsidy= biomass power generation\*subsidy intensity of biomass power price (unit: thousand US dollars)
118. accumulated net profit = INTEG(net profit,0) (unit: thousand US dollars)
119. net profit = current year profit-Income tax (unit: thousand US dollars)  
(net profit = current year profit-Income tax -subsidy from exempted tax; in Scenario V and VI)
120. Income tax = IF THEN ELSE(Time<=2021, 0 , IF THEN ELSE(Time<=2024, current year profit\*0.9\*income tax rate\*0.5 , current year profit\*0.9\*income tax rate ) ) (unit: thousand US dollars)
121. income tax exempted = IF THEN ELSE(Time<=2021, IF THEN ELSE( current year profit<=0, 0 , current year profit\*income tax rate), IF THEN ELSE(Time<=2024, current year profit\*income tax rate-current year profit\*0.9\*income tax rate\*0.5 , current year profit\*0.1\*income tax rate) ) (unit: thousand US dollars)
122. income tax rate = 0.25
123. coefficient of present value = 1/(1+discount rate)^(Time-2018)
124. discount rate = 0.14
125. accumulated after-tax present value = INTEG(after-tax present value,0) (unit: thousand US dollars)
126. after-tax present value = after-tax net cash flow\*coefficient of present value (unit: thousand US dollars)
127. accumulated net cash flow = INTEG(net cash flow,0) (unit: thousand US dollars)
128. net cash flow = cash inflow-cash outflow (unit: thousand US dollars)
129. cash outflow = business tax and surcharges + operating cost + circulating fund investment + Fixed assets investment+subsidy from exempted tax (unit: thousand US dollars)
130. operating cost = total cost-Depreciation of fixed assets-financial expenses (unit: thousand US dollars)
131. cash inflow = business income+retrieve of circulating fund+residue value of the fixed assets (unit: thousand US dollars)
132. residue value of the fixed assets = IF THEN ELSE(Time=2039, 2275, 0 ) (unit: thousand US dollars)
